# Supplementary material for: The reach of the genome signature in prokaryotes
Source: PubMed Central journal article supplement (PMC1621082; doi:10.1186/1471-2148-6-84), 2006-10-13
Supplement: 1471-2148-6-84-S1.pdf [file 1471-2148-6-84-S1.pdf]

## Additional File 1

Prokaryotic intragenomic genome signature comparisons. Note that some genera consist of only one species-type (e.g. Tropheryma). These are not considered in the intragenomic comparisons, but instead in the intraspecific comparisons.

|                            | Numbers<br>corresponding<br>to Fig. 1 |                                                    | Accession<br>numbers | Size (bp) |
|----------------------------|---------------------------------------|----------------------------------------------------|----------------------|-----------|
| <b>Bacteria</b>            |                                       |                                                    |                      |           |
| <b>Actinobacteria</b>      |                                       |                                                    |                      |           |
|                            | 1                                     | Corynebacterium_diphtheriae_NCTC_13129             | NC_002935            | 2488635   |
|                            |                                       | Corynebacterium_efficiens_YS-314                   | NC_004369            | 3147090   |
|                            |                                       | Corynebacterium_glutamicum_ATCC_13032              | NC_003450            | 3309401   |
|                            |                                       | Corynebacterium_glutamicum_ATCC_13032              | NC_006958            | 3282708   |
|                            |                                       | Corynebacterium_jeikeium_K411                      | NC_007164            | 2462499   |
|                            | 2                                     | Mycobacterium_avium_subsp_paratuberculosis_str_k10 | NC_002944            | 4829781   |
|                            |                                       | Mycobacterium_bovis_AF2122/97                      | NC_002945            | 4345492   |
|                            |                                       | Mycobacterium_leprae_TN                            | NC_002677            | 3268203   |
|                            |                                       | Mycobacterium_tuberculosis_CDC1551                 | NC_002755            | 4403837   |
|                            |                                       | Mycobacterium_tuberculosis_H37Rv                   | NC_000962            | 4411532   |
|                            | 3                                     | Streptomyces_avermitilis_MA-4680                   | NC_003155            | 9025608   |
|                            |                                       | Streptomyces_coelicolor_A3(2)                      | NC_003888            | 8667507   |
|                            | *                                     | Tropheryma_whipplei_TW08/27                        | NC_004551            | 925938    |
|                            |                                       | Tropheryma_whipplei_str_Twist                      | NC_004572            | 927303    |
| <b>Alphaproteobacteria</b> |                                       |                                                    |                      |           |
|                            | 4                                     | Anaplasma_marginale_str_St_Maries                  | NC_004842            | 1197687   |
|                            |                                       | Anaplasma_phagocytophilum_HZ                       | NC_007797            | 1471282   |
|                            | 5                                     | Bartonella_henselae_str_Houston-1                  | NC_005956            | 1931047   |

|                               |                                                                    |           |         |
|-------------------------------|--------------------------------------------------------------------|-----------|---------|
|                               | <i>Bartonella quintana</i> _str_Toulouse                           | NC_005955 | 1581384 |
| 6                             | <i>Ehrlichia canis</i> _str_Jake                                   | NC_007354 | 1315030 |
|                               | <i>Ehrlichia chaffeensis</i> _str_Arkansas                         | NC_007799 | 1176248 |
|                               | <i>Ehrlichia ruminantium</i> _str_Gardel                           | NC_006831 | 1499920 |
|                               | <i>Ehrlichia ruminantium</i> _str_Welgevonden                      | NC_005295 | 1516355 |
|                               | <i>Ehrlichia ruminantium</i> _str_Welgevonden                      | NC_006832 | 1512977 |
| 7                             | <i>Nitrobacter hamburgensis</i> _X14                               | NC_007964 | 4406967 |
|                               | <i>Nitrobacter winogradskyi</i> _Nb-255                            | NC_007406 | 3402093 |
| *                             | <i>Rhodopseudomonas palustris</i> _BisB18                          | NC_007925 | 5513844 |
|                               | <i>Rhodopseudomonas palustris</i> _BisB5                           | NC_007958 | 4892717 |
|                               | <i>Rhodopseudomonas palustris</i> _CGA009                          | NC_005296 | 5459213 |
|                               | <i>Rhodopseudomonas palustris</i> _HaA2                            | NC_007778 | 5331656 |
| 8                             | <i>Rickettsia bellii</i> _RML369-C                                 | NC_007940 | 1522076 |
|                               | <i>Rickettsia conorii</i> _str_Malish_7                            | NC_003103 | 1268755 |
|                               | <i>Rickettsia felis</i> _URRWXCa2                                  | NC_007109 | 1485148 |
|                               | <i>Rickettsia prowazekii</i> _str_Madrid_E                         | NC_000963 | 1111523 |
|                               | <i>Rickettsia typhi</i> _str_Wilmington                            | NC_006142 | 1111496 |
| 9                             | <i>Wolbachia endosymbiont</i> _of_ <i>Drosophila melanogaster</i>  | NC_002978 | 1267782 |
|                               | <i>Wolbachia endosymbiont</i> _strain_TRS_of_ <i>Brugia malayi</i> | NC_006833 | 1080084 |
| <b>Bacteroidetes/Chlorobi</b> |                                                                    |           |         |
| 10                            | <i>Bacteroides fragilis</i> _NCTC_9343                             | NC_003228 | 5205140 |
|                               | <i>Bacteroides fragilis</i> _YCH46                                 | NC_006347 | 5277274 |
|                               | <i>Bacteroides thetaiotaomicron</i> _VPI-5482                      | NC_004663 | 6260361 |
| 11                            | <i>Chlorobium chlorochromatii</i> _CaD3                            | NC_007514 | 2572079 |
|                               | <i>Chlorobium tepidum</i> _TLS                                     | NC_002932 | 2154946 |

**Betaproteobacteria**

|    |                                |           |         |
|----|--------------------------------|-----------|---------|
| 12 | Bordetella_bronchiseptica_RB50 | NC_002927 | 5339179 |
|    | Bordetella_parapertussis_12822 | NC_002928 | 4773551 |
|    | Bordetella_pertussis_Tohama_I  | NC_002929 | 4086189 |
| 13 | Neisseria_gonorrhoeae_FA_1090  | NC_002946 | 2153922 |
|    | Neisseria_meningitidis_MC58    | NC_003112 | 2272360 |
|    | Neisseria_meningitidis_Z2491   | NC_003116 | 2184406 |

**Chlamydiae/Verrucomicrobia**

|    |                                  |           |         |
|----|----------------------------------|-----------|---------|
| 14 | Chlamydia_muridarum_Nigg         | NC_002620 | 1072950 |
|    | Chlamydia_trachomatis_A/HAR-13   | NC_007429 | 1044459 |
|    | Chlamydia_trachomatis_D/UW-3/CX  | NC_000117 | 1042519 |
| 15 | Chlamydomphila_abortus_S26/3     | NC_004552 | 1144377 |
|    | Chlamydomphila_caviae_GPIC       | NC_003361 | 1173390 |
|    | Chlamydomphila_felis_Fe/C-56     | NC_007899 | 1166239 |
|    | Chlamydomphila_pneumoniae_AR39   | NC_002179 | 1229853 |
|    | Chlamydomphila_pneumoniae_CWL029 | NC_000922 | 1230230 |
|    | Chlamydomphila_pneumoniae_J138   | NC_002491 | 1226565 |
|    | Chlamydomphila_pneumoniae_TW-183 | NC_005043 | 1225935 |

**Chloroflexi**

|    |                                 |           |         |
|----|---------------------------------|-----------|---------|
| 16 | Dehalococcoides_ethenogenes_195 | NC_002936 | 1469720 |
|    | Dehalococcoides_sp_CBDB1        | NC_007356 | 1395502 |

**Cyanobacteria**

|   |                                                     |           |         |
|---|-----------------------------------------------------|-----------|---------|
| * | Prochlorococcus_marinus_str_MIT_9312                | NC_007577 | 1709204 |
|   | Prochlorococcus_marinus_str_MIT_9313                | NC_005071 | 2410873 |
|   | Prochlorococcus_marinus_str_NATL2A                  | NC_007335 | 1842899 |
|   | Prochlorococcus_marinus_subsp_marinus_str_CCMP1375  | NC_005042 | 1751080 |
|   | Prochlorococcus_marinus_subsp_pastoris_str_CCMP1986 | NC_005072 | 1657990 |

|                              |    |                                                         |           |         |
|------------------------------|----|---------------------------------------------------------|-----------|---------|
|                              | 17 | Synechococcus_elongatus_PCC_6301                        | NC_006576 | 2696255 |
|                              |    | Synechococcus_elongatus_PCC_7942                        | NC_007604 | 2695903 |
|                              |    | Synechococcus_sp_CC9605                                 | NC_007516 | 2510659 |
|                              |    | Synechococcus_sp_CC9902                                 | NC_007513 | 2234828 |
|                              |    | Synechococcus_sp_WH_8102                                | NC_005070 | 2434428 |
| <b>Deinococcus-Thermus</b>   |    |                                                         |           |         |
|                              | *  | Thermus_thermophilus_HB27                               | NC_005835 | 1894877 |
|                              |    | Thermus_thermophilus_HB8                                | NC_006461 | 1849742 |
| <b>Deltaproteobacteria</b>   |    |                                                         |           |         |
|                              | 18 | Desulfovibrio_desulfuricans_G20                         | NC_007519 | 3730232 |
|                              |    | Desulfovibrio_vulgaris_subsp_vulgaris_str_Hildenborough | NC_002937 | 3570858 |
|                              | 19 | Geobacter_metallireducens_GS-15                         | NC_007517 | 3997420 |
|                              |    | Geobacter_sulfurreducens_PCA                            | NC_002939 | 3814139 |
| <b>Epsilonproteobacteria</b> |    |                                                         |           |         |
|                              | *  | Campylobacter_jejuni_RM1221                             | NC_003912 | 1777831 |
|                              |    | Campylobacter_jejuni_subsp_jejuni_NCTC_11168            | NC_002163 | 1641481 |
|                              | 20 | Helicobacter_hepaticus_ATCC_51449                       | NC_004917 | 1799146 |
|                              |    | Helicobacter_pylori_26695                               | NC_000915 | 1667867 |
|                              |    | Helicobacter_pylori_J99                                 | NC_000921 | 1643831 |
| <b>Firmicutes</b>            |    |                                                         |           |         |
|                              | 21 | Bacillus_anthraxis_A2012_unfinished_sequence            | NC_003995 | 5051677 |
|                              |    | Bacillus_anthraxis_str_Ames                             | NC_003997 | 5227293 |
|                              |    | Bacillus_anthraxis_str_Ames_AncestorcleanNC_007404fna   | NC_007530 | 5227419 |
|                              |    | Bacillus_anthraxis_str_Sterne                           | NC_005945 | 5228663 |
|                              |    | Bacillus_cereus_ATCC_10987                              | NC_003909 | 5224283 |
|                              |    | Bacillus_cereus_ATCC_14579                              | NC_004722 | 5411809 |
|                              |    | Bacillus_cereus_E33L                                    | NC_006274 | 5300915 |

|           |                                                    |           |         |
|-----------|----------------------------------------------------|-----------|---------|
|           | Bacillus_clausii_KSM-K16                           | NC_006582 | 4303871 |
|           | Bacillus_halodurans_C-125                          | NC_002570 | 4202352 |
|           | Bacillus_licheniformis_ATCC_14580                  | NC_006270 | 4222334 |
|           | Bacillus_licheniformis_ATCC_14580                  | NC_006322 | 4222645 |
|           | Bacillus_subtilis_subsp_subtilis_str_168           | NC_000964 | 4214630 |
|           | Bacillus_thuringiensis_serovar_konkukian_str_97-27 | NC_005957 | 5237682 |
| <b>22</b> | Clostridium_acetobutylicum_ATCC_824                | NC_003030 | 3940880 |
|           | Clostridium_perfringens_str_13                     | NC_003366 | 3031430 |
|           | Clostridium_tetani_E88                             | NC_004557 | 2799251 |
| <b>23</b> | Lactobacillus_acidophilus_NCFM                     | NC_006814 | 1993564 |
|           | Lactobacillus_johnsonii_NCC_533                    | NC_005362 | 1992676 |
|           | Lactobacillus_plantarum_WCFS1                      | NC_004567 | 3308274 |
|           | Lactobacillus_sakei_subsp_sakei_23K                | NC_007576 | 1884661 |
|           | Lactobacillus_salivarius_subsp_salivarius_UCC118   | NC_007929 | 1827111 |
| <b>24</b> | Listeria_innocua_Clip11262                         | NC_003212 | 3011208 |
|           | Listeria_monocytogenes_EGD-e                       | NC_003210 | 2944528 |
|           | Listeria_monocytogenes_str_4b_F2365                | NC_002973 | 2905187 |
| <b>25</b> | Mycoplasma_capricolum_subsp_capricolum_ATCC_27343  | NC_007633 | 1010023 |
|           | Mycoplasma_gallisepticum_R                         | NC_004829 | 996422  |
|           | Mycoplasma_genitalium_G-37                         | NC_000908 | 580074  |
|           | Mycoplasma_hyopneumoniae_232                       | NC_006360 | 892758  |
|           | Mycoplasma_hyopneumoniae_7448                      | NC_007332 | 920079  |
|           | Mycoplasma_hyopneumoniae_J                         | NC_007295 | 897405  |
|           | Mycoplasma_mobile_163K                             | NC_006908 | 777079  |
|           | Mycoplasma_mycoides_subsp_mycoides_SC_str_PG1      | NC_005364 | 1211703 |
|           | Mycoplasma_penetrans_HF-2                          | NC_004432 | 1358633 |
|           | Mycoplasma_pneumoniae_M129                         | NC_000912 | 816394  |
|           | Mycoplasma_pulmonis_UAB_CTIP                       | NC_002771 | 963879  |
|           | Mycoplasma_synoviae_53                             | NC_007294 | 799476  |

|           |                                                  |           |         |
|-----------|--------------------------------------------------|-----------|---------|
|           | Ureaplasma_parvum_serovar_3_str_ATCC_700970      | NC_002162 | 751719  |
| <b>26</b> | Staphylococcus_aureus_RF122                      | NC_007622 | 2742531 |
|           | Staphylococcus_aureus_subsp_aureus_COL           | NC_002951 | 2809422 |
|           | Staphylococcus_aureus_subsp_aureus_MRSA252       | NC_002952 | 2902619 |
|           | Staphylococcus_aureus_subsp_aureus_MSSA476       | NC_002953 | 2799802 |
|           | Staphylococcus_aureus_subsp_aureus_MW2           | NC_003923 | 2820462 |
|           | Staphylococcus_aureus_subsp_aureus_Mu50          | NC_002758 | 2878529 |
|           | Staphylococcus_aureus_subsp_aureus_N315          | NC_002745 | 2814816 |
|           | Staphylococcus_aureus_subsp_aureus_NCTC_8325     | NC_007795 | 2821361 |
|           | Staphylococcus_aureus_subsp_aureus_USA300        | NC_007793 | 2872769 |
|           | Staphylococcus_epidermidis_ATCC_12228            | NC_004461 | 2499279 |
|           | Staphylococcus_epidermidis_RP62A                 | NC_002976 | 2616530 |
|           | Staphylococcus_haemolyticus_JCSC1435             | NC_007168 | 2685015 |
|           | Staphylococcus_saprophyticus_subsp_saprophyticus | NC_007350 | 2516575 |
| <b>27</b> | Streptococcus_agalactiae_2603V/R                 | NC_004116 | 2160267 |
|           | Streptococcus_agalactiae_A909                    | NC_007432 | 2127839 |
|           | Streptococcus_agalactiae_NEM316                  | NC_004368 | 2211485 |
|           | Streptococcus_mutans_UA159                       | NC_004350 | 2030921 |
|           | Streptococcus_pneumoniae_R6                      | NC_003098 | 2038615 |
|           | Streptococcus_pneumoniae_TIGR4                   | NC_003028 | 2160837 |
|           | Streptococcus_pyogenes_M1_GAS                    | NC_002737 | 1852441 |
|           | Streptococcus_pyogenes_MGAS10394                 | NC_006086 | 1899877 |
|           | Streptococcus_pyogenes_MGAS315                   | NC_004070 | 1900521 |
|           | Streptococcus_pyogenes_MGAS5005                  | NC_007297 | 1838554 |
|           | Streptococcus_pyogenes_MGAS6180                  | NC_007296 | 1897573 |
|           | Streptococcus_pyogenes_MGAS8232                  | NC_003485 | 1895017 |
|           | Streptococcus_pyogenes_SSI-1                     | NC_004606 | 1894275 |
|           | Streptococcus_thermophilus_CNRZ1066              | NC_006449 | 1796226 |
|           | Streptococcus_thermophilus_LMG_18311             | NC_006448 | 1796846 |

### **Gammaproteobacteria**

|           |                                                             |           |         |
|-----------|-------------------------------------------------------------|-----------|---------|
|           | * Buchnera_aphidicola_str_APS_(Acyrtosiphon_pisum)          | NC_002528 | 640681  |
|           | Buchnera_aphidicola_str_Bp_(Baizongia_pistaciae)            | NC_004545 | 615980  |
|           | Buchnera_aphidicola_str_Sg_(Schizaphis_graminum)            | NC_004061 | 641454  |
| <b>28</b> | Candidatus_Blochmannia_floridanus                           | NC_005061 | 705557  |
|           | Candidatus_Blochmannia_pennsylvanicus_str_BPEN              | NC_007292 | 791654  |
|           | * Escherichia_coli_CFT073                                   | NC_004431 | 5231428 |
|           | Escherichia_coli_K12                                        | NC_000913 | 4639675 |
|           | Escherichia_coli_O157:H7                                    | NC_002695 | 5498450 |
|           | Escherichia_coli_O157:H7_EDL933                             | NC_002655 | 5528445 |
|           | Escherichia_coli_UTI89                                      | NC_007946 | 5065741 |
|           | Escherichia_coli_W3110_DNA                                  | AC_000091 | 4646332 |
|           | Shigella_boydii_Sb227                                       | NC_007613 | 4519823 |
|           | Shigella_dysenteriae_Sd197                                  | NC_007606 | 4369232 |
|           | Shigella_flexneri_2a_str_2457T                              | NC_004741 | 4599354 |
|           | Shigella_flexneri_2a_str_301                                | NC_004337 | 4607203 |
|           | Shigella_sonnei_Ss046                                       | NC_007384 | 4825265 |
|           | * Francisella_tularensis_subsp_holarctica                   | NC_007880 | 1895994 |
|           | Francisella_tularensis_subsp_tularensis                     | NC_006570 | 1892819 |
| <b>29</b> | Haemophilus_ducreyi_35000HP                                 | NC_002940 | 1698955 |
|           | Haemophilus_influenzae_86-028NP                             | NC_007146 | 1913428 |
|           | Haemophilus_influenzae_Rd_KW20                              | NC_000907 | 1830138 |
|           | * Legionella_pneumophila_str_Lens                           | NC_006369 | 3345687 |
|           | Legionella_pneumophila_str_Paris                            | NC_006368 | 3503610 |
|           | Legionella_pneumophila_subsp_pneumophila_str_Philadelphia_1 | NC_002942 | 3397754 |
| <b>30</b> | Pseudomonas_aeruginosa_PAO1                                 | NC_002516 | 6264403 |
|           | Pseudomonas_fluorescens_Pf-5                                | NC_004129 | 7074893 |
|           | Pseudomonas_fluorescens_PfO-1                               | NC_007492 | 6438405 |

|                     |                                                                            |           |         |
|---------------------|----------------------------------------------------------------------------|-----------|---------|
|                     | <i>Pseudomonas_putida_KT2440</i>                                           | NC_002947 | 6181863 |
|                     | <i>Pseudomonas_syringae_pv_phaseolicola_1448A</i>                          | NC_005773 | 5928787 |
|                     | <i>Pseudomonas_syringae_pv_syringae_B728a</i>                              | NC_007005 | 6093698 |
|                     | <i>Pseudomonas_syringae_pv_tomato_str_DC3000</i>                           | NC_004578 | 6397126 |
| <b>31</b>           | <i>Salmonella_enterica_subsp_enterica_serovar_Choleraesuis_str_SC-B67</i>  | NC_006905 | 4755700 |
|                     | <i>Salmonella_enterica_subsp_enterica_serovar_Paratypi_A_str_ATCC_9150</i> | NC_006511 | 4585229 |
|                     | <i>Salmonella_enterica_subsp_enterica_serovar_Typhi_Ty2</i>                | NC_004631 | 4791961 |
|                     | <i>Salmonella_enterica_subsp_enterica_serovar_Typhi_str_CT18</i>           | NC_003198 | 4809037 |
|                     | <i>Salmonella_typhimurium_LT2</i>                                          | NC_003197 | 4857432 |
| <b>32</b>           | <i>Shewanella_denitrificans_OS217</i>                                      | NC_007954 | 4545906 |
|                     | <i>Shewanella_oneidensis_MR-1</i>                                          | NC_004347 | 4969803 |
| <b>33</b>           | <i>Xanthomonas_axonopodis_pv_citri_str_306</i>                             | NC_003919 | 5175554 |
|                     | <i>Xanthomonas_campestris_pv_campestris_str_8004</i>                       | NC_007086 | 5148708 |
|                     | <i>Xanthomonas_campestris_pv_campestris_str_ATCC_33913</i>                 | NC_003902 | 5076188 |
|                     | <i>Xanthomonas_campestris_pv-vesicatoria_str_85-10</i>                     | NC_007508 | 5178466 |
|                     | <i>Xanthomonas_oryzae_pv_oryzae_KACC10331</i>                              | NC_006834 | 4941439 |
| *                   | <i>Xylella_fastidiosa_9a5c</i>                                             | NC_002488 | 2679306 |
|                     | <i>Xylella_fastidiosa_Temecula1</i>                                        | NC_004556 | 2519802 |
| <b>34</b>           | <i>Yersinia_pestis_CO92</i>                                                | NC_003143 | 4653728 |
|                     | <i>Yersinia_pestis_KIM</i>                                                 | NC_004088 | 4600755 |
|                     | <i>Yersinia_pestis_biovar_Medievalis_str_91001</i>                         | NC_005810 | 4595065 |
|                     | <i>Yersinia_pseudotuberculosis_IP_32953</i>                                | NC_006155 | 4744671 |
| <b>Spirochaetes</b> |                                                                            |           |         |
| <b>35</b>           | <i>Borrelia_burgdorferi_B31</i>                                            | NC_001318 | 910724  |
|                     | <i>Borrelia_garinii_PBi_chromosome_linear</i>                              | NC_006156 | 904246  |
| <b>36</b>           | <i>Treponema_denticola_ATCC_35405</i>                                      | NC_002967 | 2843201 |



|                      |                                                |           |            |
|----------------------|------------------------------------------------|-----------|------------|
|                      | Treponema_pallidum_subsp_pallidum_str_Nichols  | NC_000919 | 1138011    |
| <b>Archaea</b>       |                                                |           |            |
| <b>Crenarchaeota</b> |                                                |           |            |
| <b>37</b>            | Sulfolobus_acidocaldarius_DSM_639              | NC_007181 | 2225959    |
|                      | Sulfolobus_solfataricus_P2                     | NC_002754 | 2992245    |
|                      | Sulfolobus_tokodaii_str_7                      | NC_003106 | 2694756    |
| <b>Euryarchaeota</b> |                                                |           |            |
| <b>38</b>            | Methanosarcina_acetivorans_C2A                 | NC_003552 | 5751492    |
|                      | Methanosarcina_barkeri_str_fusaro_chromosome_1 | NC_007355 | 4837408    |
|                      | Methanosarcina_mazei_Go1                       | NC_003901 | 4096345    |
| <b>39</b>            | Pyrococcus_abyssi_GE5                          | NC_000868 | 1765118    |
|                      | Pyrococcus_furiosus_DSM_3638                   | NC_003413 | 1908256    |
|                      | Pyrococcus_horikoshii_OT3                      | NC_000961 | 1738505    |
| <b>40</b>            | Thermoplasma_acidophilum_DSM_1728              | NC_002578 | 1564906    |
|                      | Thermoplasma_volcanium_GSS1                    | NC_002689 | 1584804    |
|                      | <b>Total number of genome sequences</b>        |           | <b>209</b> |

**\*) Genera with only 1 species are excluded from the intrageneric comparisons (these are included in the intraspecific comparisons)**
