# Supplementary material for: The reach of the genome signature in prokaryotes
Source: PubMed Central journal article supplement (PMC1621082; doi:10.1186/1471-2148-6-84), 2006-10-13
Supplement: 1471-2148-6-84-S2.pdf [file 1471-2148-6-84-S2.pdf]

## Additional File 1

Prokaryotic intraspecific genome signature comparisons (the  $\delta^*$  scores are available from the large matrix at <http://deltarho.amc.nl>).

| <b>Bacteria</b>                | <b>Number</b> |                            | <b># of strains</b> | <b>Accession numbers</b> |           |           |           |
|--------------------------------|---------------|----------------------------|---------------------|--------------------------|-----------|-----------|-----------|
| Actinobacteria                 |               |                            |                     |                          |           |           |           |
|                                | 1             | Corynebacterium_glutamicum | 2                   | NC_003450                | NC_006958 |           |           |
|                                | 2             | Mycobacterium_tuberculosis | 2                   | NC_002755                | NC_000962 |           |           |
|                                | 3             | Tropheryma_whipplei        | 2                   | NC_004551                | NC_004572 |           |           |
| Alphaproteobacteria            |               |                            |                     |                          |           |           |           |
|                                | 4             | Ehrlichia_ruminantium      | 3                   | NC_006831                | NC_005295 | NC_006832 |           |
|                                | 5             | Rhodopseudomonas_palustris | 4                   | NC_007925                | NC_007958 | NC_005296 | NC_007778 |
| Bacteroidetes/Chlorobi         |               |                            |                     |                          |           |           |           |
|                                | 6             | Bacteroides_fragilis       | 2                   | NC_003228                | NC_006347 |           |           |
| Betaproteobacteria             |               |                            |                     |                          |           |           |           |
|                                | 7             | Neisseria_meningitidis     | 2                   | NC_003112                | NC_003116 |           |           |
| Chlamydiae/<br>Verrucomicrobia |               |                            |                     |                          |           |           |           |
|                                | 8             | Chlamydia_trachomatis      | 2                   | NC_007429                | NC_000117 |           |           |

|                       |           |                            |          |           |           |           |           |           |
|-----------------------|-----------|----------------------------|----------|-----------|-----------|-----------|-----------|-----------|
|                       | <b>9</b>  | Chlamydophila_pneumoniae   | <b>4</b> | NC_002179 | NC_000922 | NC_002491 | NC_005043 |           |
| Cyanobacteria         |           |                            |          |           |           |           |           |           |
|                       | <b>10</b> | Prochlorococcus_marinus    | <b>5</b> | NC_007577 | NC_005071 | NC_007335 | NC_005042 | NC_005072 |
| Deinococcus-Thermus   |           |                            |          |           |           |           |           |           |
|                       | <b>11</b> | Thermus_thermophilus       | <b>2</b> | NC_005835 | NC_006461 |           |           |           |
| Epsilonproteobacteria |           |                            |          |           |           |           |           |           |
|                       | <b>12</b> | Campylobacter_jejuni       | <b>2</b> | NC_003912 | NC_002163 |           |           |           |
|                       | <b>13</b> | Helicobacter_pylori        | <b>2</b> | NC_000915 | NC_000921 |           |           |           |
| Firmicutes            |           |                            |          |           |           |           |           |           |
|                       | <b>14</b> | Bacillus_cereus cluster    | <b>8</b> | NC_003995 | NC_003997 | NC_007530 | NC_005945 |           |
|                       |           |                            |          | NC_003909 | NC_004722 | NC_006274 | NC_005957 |           |
|                       | <b>15</b> | Listeria_monocytogenes     | <b>2</b> | NC_003210 | NC_002973 |           |           |           |
|                       | <b>16</b> | Mycoplasma_hyopneumoniae   | <b>3</b> | NC_006360 | NC_007332 | NC_007295 |           |           |
|                       | <b>17</b> | Staphylococcus_aureus      | <b>9</b> | NC_007622 | NC_002951 | NC_002952 | NC_002953 | NC_003923 |
|                       |           |                            |          | NC_002758 | NC_002745 | NC_007795 | NC_007793 |           |
|                       | <b>18</b> | Staphylococcus_epidermidis | <b>2</b> | NC_004461 | NC_002976 |           |           |           |
|                       | <b>19</b> | Streptococcus_agalactiae   | <b>3</b> | NC_004116 | NC_007432 |           |           |           |
|                       | <b>20</b> | Streptococcus_pneumoniae   | <b>2</b> | NC_003098 | NC_003028 |           |           |           |
|                       | <b>21</b> | Streptococcus_pyogenes     | <b>7</b> | NC_002737 | NC_006086 | NC_004070 | NC_007297 | NC_007296 |
|                       |           |                            |          | NC_004606 | NC_007296 | NC_003485 | NC_004606 | NC_003485 |

|                     |                                             |                                                  |            |           |           |           |           |           |           |  |
|---------------------|---------------------------------------------|--------------------------------------------------|------------|-----------|-----------|-----------|-----------|-----------|-----------|--|
| Gammaproteobacteria | 22                                          | <i>Streptococcus_thermophilus</i>                | 2          | NC_006449 | NC_006448 |           |           |           |           |  |
|                     | 23                                          | <i>Buchnera_aphidicola</i>                       | 3          | NC_002528 | NC_004545 | NC_004061 |           |           |           |  |
|                     | 24                                          | <i>Escherichia_coli</i> (including<br>Shigellae) | 11         | NC_004431 | NC_000913 | NC_002695 | NC_002655 | NC_007946 | AC_000091 |  |
|                     |                                             |                                                  |            | NC_007613 | NC_007606 | NC_004741 | NC_004337 | NC_007384 |           |  |
|                     | 25                                          | <i>Francisella_tularensis</i>                    | 2          | NC_007880 | NC_006570 |           |           |           |           |  |
|                     | 26                                          | <i>Haemophilus_influenzae</i>                    | 2          | NC_007146 | NC_000907 |           |           |           |           |  |
|                     | 27                                          | <i>Legionella_pneumophila</i>                    | 3          | NC_006369 | NC_006368 | NC_002942 |           |           |           |  |
|                     | 28                                          | <i>Pseudomonas_fluorescens</i>                   | 2          | NC_004129 | NC_007492 |           |           |           |           |  |
|                     | 29                                          | <i>Pseudomonas_syringae</i>                      | 3          | NC_005773 | NC_007005 | NC_004578 |           |           |           |  |
|                     | 30                                          | <i>Salmonella_enterica</i>                       | 4          | NC_006905 | NC_006511 | NC_004631 | NC_003198 |           |           |  |
|                     | 31                                          | <i>Xanthomonas_campestris</i>                    | 3          | NC_007086 | NC_003902 | NC_007508 |           |           |           |  |
|                     | 32                                          | <i>Xylella_fastidiosa</i>                        | 2          | NC_002488 | NC_004556 |           |           |           |           |  |
|                     | 33                                          | <i>Yersinia_pestis</i>                           | 4          | NC_003143 | NC_004088 | NC_005810 |           |           |           |  |
|                     | <b>Total number of genome<br/>sequences</b> |                                                  | <b>111</b> |           |           |           |           |           |           |  |
