# Supplementary material for: The reach of the genome signature in prokaryotes
Source: PubMed Central journal article supplement (PMC1621082; doi:10.1186/1471-2148-6-84), 2006-10-13
Supplement: 1471-2148-6-84-S3.pdf [file 1471-2148-6-84-S3.pdf]

### Additional File 3

Prokaryotic intrageneric genome signature comparisons. In these matrices; the 16S rDNA sequence identity is given in the top-right half, and the  $\delta^*$  (x1000) are given in the lower left part. Note that comparisons are intrageneric, except for the E. coli/Shigella/Salmonella group (which consists of multiple genera) and the Bacillus cereus cluster, which is considered one species.

#### Prokaryotic species

|                                                     |      |      |      |      |      |      |      |      |      |      |
|-----------------------------------------------------|------|------|------|------|------|------|------|------|------|------|
|                                                     | 1    | 2    | 3    | 4    | 5    |      |      |      |      |      |
| 1. Mycobacterium avium subsp. paratuberculosis K-10 |      | 98.3 | 97   | 98.3 | 98.3 |      |      |      |      |      |
| 2. Mycobacterium bovis AF2122/97                    | 30.3 |      | 97.2 | 100  | 100  |      |      |      |      |      |
| 3. Mycobacterium leprae TN                          | 68.3 | 48.4 |      | 97.2 | 97.2 |      |      |      |      |      |
| 4. Mycobacterium tuberculosis CDC1551               | 30.1 | 0.3  | 48.6 |      | 100  |      |      |      |      |      |
| 5. Mycobacterium tuberculosis H37Rv                 | 30.1 | 0.4  | 48.5 | 0.5  |      |      |      |      |      |      |
|                                                     | 1    | 2    | 3    | 4    | 5    |      |      |      |      |      |
| 1. Rickettsia bellii RML369-C                       |      | 99.1 | 99.4 | 98.2 | 97.8 |      |      |      |      |      |
| 2. Rickettsia conorii str. Malish 7                 | 37.2 |      | 99.3 | 98.4 | 98   |      |      |      |      |      |
| 3. Rickettsia felis URRWX Cal 2                     | 39.2 | 11.6 |      | 98.3 | 97.9 |      |      |      |      |      |
| 4. Rickettsia prowazekii str. Madrid E              | 42.8 | 58.5 | 65.0 |      | 98.8 |      |      |      |      |      |
| 5. Rickettsia typhi str. Wilmington                 | 50.4 | 66.6 | 74.0 | 10.2 |      |      |      |      |      |      |
|                                                     | 1    | 2    | 3    | 4    | 5    | 6    | 7    | 8    | 9    | 10   |
| 1. Chlamydia muridarum Nigg                         |      | 98.4 | 98.6 | 95.8 | 95.9 | 95.7 | 94.5 | 94.4 | 94.4 | 94.5 |
| 2. Chlamydia trachomatis A/HAR13                    | 25.2 |      | 99.9 | 95.4 | 95.5 | 95.1 | 94   | 94   | 93.9 | 94   |
| 3. Chlamydia trachomatis D/UW3/CX                   | 25.2 | 0.5  |      | 95.5 | 95.7 | 95.3 | 94.2 | 94.1 | 94   | 94.2 |
| 4. Chlamydia philae abortus S26/3                   | 40.7 | 40.5 | 40.8 |      | 99.5 | 98.4 | 95.5 | 95.5 | 95.4 | 95.5 |
| 5. Chlamydia philae GPIC                            | 29.0 | 27.7 | 27.9 | 19.7 |      | 98.8 | 95.5 | 95.4 | 95.3 | 95.5 |
| 6. Chlamydia felis Fe/C56                           | 24.0 | 32.4 | 32.7 | 22.2 | 16.9 |      | 95.1 | 95.1 | 95   | 95.1 |
| 7. Chlamydia pneumoniae AR39                        | 27.8 | 18.4 | 18.8 | 38.0 | 28.9 | 35.5 |      | 99.9 | 99.9 | 100  |
| 8. Chlamydia pneumoniae CWL029                      | 27.8 | 18.4 | 18.8 | 38.0 | 28.9 | 35.5 | 0.1  |      | 99.8 | 99.9 |
| 9. Chlamydia pneumoniae J138                        | 27.8 | 18.3 | 18.7 | 38.0 | 28.7 | 35.5 | 0.2  | 0.2  |      | 99.9 |

|                      |      |      |      |      |      |      |     |     |     |  |  |  |  |
|----------------------|------|------|------|------|------|------|-----|-----|-----|--|--|--|--|
| 10. CpneumoniaeTW183 | 27.8 | 18.4 | 18.8 | 37.9 | 28.8 | 35.4 | 0.2 | 0.2 | 0.3 |  |  |  |  |
|----------------------|------|------|------|------|------|------|-----|-----|-----|--|--|--|--|

|                                                  |      |       |       |      |      |  |  |  |  |  |  |  |  |
|--------------------------------------------------|------|-------|-------|------|------|--|--|--|--|--|--|--|--|
|                                                  | 1    | 2     | 3     | 4    | 5    |  |  |  |  |  |  |  |  |
| 1. LactobacillusacidophilusNCFM                  |      | 92    | 86.1  | 86.7 | 86.1 |  |  |  |  |  |  |  |  |
| 2. LactobacillusjohnsoniiNCC533                  | 34.5 |       | 89.6  | 89   | 88.1 |  |  |  |  |  |  |  |  |
| 3. LactobacillusplantarumWCFS1                   | 83.4 | 111.3 |       | 92.9 | 90.6 |  |  |  |  |  |  |  |  |
| 4. Lactobacillussakeisubsp.sakei23K              | 75.5 | 98.1  | 33.0  |      | 90.6 |  |  |  |  |  |  |  |  |
| 5. Lactobacillussalivariussubsp.salivariusUCC118 | 41.3 | 33.3  | 105.1 | 97.6 |      |  |  |  |  |  |  |  |  |

|                                                  |       |       |       |       |       |       |       |       |       |       |       |       |      |
|--------------------------------------------------|-------|-------|-------|-------|-------|-------|-------|-------|-------|-------|-------|-------|------|
|                                                  | 1     | 2     | 3     | 4     | 5     | 6     | 7     | 8     | 9     | 10    | 11    | 12    | 13   |
| 1. Mycoplasmacapricolumsubsp.capricolumATCC27343 |       | 79.2  | 77.7  | 79    | 79    | 79    | 81.6  | 99.3  | 75.6  | 77.7  | 79.9  | 80.1  | 75   |
| 2. MycoplasmagenitaliumG37                       | 80.4  |       | 89.7  | 73.5  | 73.5  | 73.5  | 76.2  | 78.8  | 83.1  | 89.7  | 76.3  | 77.5  | 82.6 |
| 3. Mycoplasmahyopneumoniae232                    | 81.3  | 109.1 |       | 72.6  | 72.7  | 72.6  | 76.2  | 77.5  | 82.2  | 98.1  | 75.7  | 75.9  | 81.2 |
| 4. Mycoplasmahyopneumoniae7448                   | 177.9 | 170.1 | 185.6 |       | 99.8  | 99.8  | 86.7  | 78.7  | 70    | 72.4  | 85.8  | 85.7  | 70.5 |
| 5. MycoplasmahyopneumoniaeJ                      | 175.8 | 167.8 | 183.6 | 3.5   |       | 99.9  | 86.7  | 78.7  | 70    | 72.4  | 85.8  | 85.6  | 70.5 |
| 6. MycoplasmahyopneumoniaeJ                      | 174.9 | 166.6 | 182.8 | 4.1   | 1.3   |       | 86.7  | 78.7  | 70    | 72.3  | 85.9  | 85.7  | 70.7 |
| 7. Mycoplasmamobile163K                          | 77.2  | 121.3 | 79.3  | 127.9 | 125.7 | 124.4 |       | 81.2  | 74    | 75.9  | 86.8  | 85.9  | 73.4 |
| 8. Mycoplasmamycooidessubsp.mycoidesSCstr.PG1    | 18.1  | 67.2  | 71.0  | 181.0 | 178.8 | 177.5 | 74.5  |       | 75.4  | 77.4  | 79.9  | 79.8  | 74.9 |
| 9. MycoplasmapenetransHF-2                       | 45.4  | 84.8  | 78.3  | 210.7 | 208.5 | 207.2 | 99.0  | 41.1  |       | 82.2  | 72.8  | 74    | 86.9 |
| 10. MycoplasmapneumoniaeM129                     | 148.5 | 107.7 | 87.6  | 153.8 | 151.8 | 151.0 | 148.0 | 142.4 | 153.9 |       | 75.4  | 75.2  | 81.6 |
| 11. MycoplasmapulmonisUABCTIP                    | 56.7  | 127.6 | 96.4  | 156.3 | 154.2 | 153.1 | 44.7  | 67.4  | 87.8  | 161.3 |       | 87.8  | 72   |
| 12. Mycoplasmasyoviae53                          | 106.1 | 94.4  | 137.8 | 134.8 | 132.5 | 132.6 | 118.5 | 113.6 | 147.8 | 142.6 | 109.6 |       | 73.3 |
| 13. Ureaplasmaparvumserovar3str.ATCC700970       | 105.0 | 103.3 | 117.2 | 137.4 | 134.5 | 134.4 | 127.6 | 102.7 | 117.8 | 121.4 | 149.2 | 118.3 |      |

|                                                 |     |      |      |      |      |      |      |      |      |      |      |      |      |
|-------------------------------------------------|-----|------|------|------|------|------|------|------|------|------|------|------|------|
|                                                 | 1   | 2    | 3    | 4    | 5    | 6    | 7    | 8    | 9    | 10   | 11   | 12   | 13   |
| 1. Staphylococcus aureus RF122                  |     | 99.9 | 99.9 | 99.9 | 99.9 | 99.9 | 99.8 | 99.8 | 99.9 | 98.5 | 98.6 | 98.4 | 97.8 |
| 2. Staphylococcus aureus subsp. aureus COL      | 2.8 |      | 100  | 100  | 100  | 99.9 | 99.9 | 99.9 | 100  | 98.5 | 98.7 | 98.5 | 97.8 |
| 3. Staphylococcus aureus subsp. aureus MRSA252  | 2.9 | 1.6  |      | 100  | 100  | 99.9 | 99.9 | 99.9 | 100  | 98.5 | 98.7 | 98.5 | 97.8 |
| 4. Staphylococcus aureus subsp. aureus MSSA476  | 2.3 | 1.1  | 1.1  |      | 100  | 99.9 | 99.9 | 99.9 | 100  | 98.5 | 98.7 | 98.5 | 97.8 |
| 5. Staphylococcus aureus subsp. aureus MW2      | 2.6 | 0.9  | 1.4  | 0.4  |      | 99.9 | 99.9 | 99.9 | 100  | 98.5 | 98.7 | 98.5 | 97.8 |
| 6. Staphylococcus aureus subsp. aureus Mu50     | 3.0 | 2.0  | 1.2  | 1.4  | 1.6  |      | 99.8 | 99.8 | 99.9 | 98.5 | 98.6 | 98.4 | 97.8 |
| 7. Staphylococcus aureus subsp. aureus N315     | 2.7 | 1.4  | 1.3  | 0.8  | 0.9  | 1.1  |      | 99.7 | 99.9 | 98.5 | 98.7 | 98.3 | 97.7 |
| 8. Staphylococcus aureus subsp. aureus NCTC8325 | 2.6 | 1.0  | 1.2  | 0.8  | 0.8  | 1.2  | 1.0  |      | 99.9 | 98.4 | 98.6 | 98.3 | 97.7 |

|                                                             |      |      |      |      |      |      |      |      |      |      |      |      |      |
|-------------------------------------------------------------|------|------|------|------|------|------|------|------|------|------|------|------|------|
| 9. <i>Staphylococcus aureus</i> subsp. <i>aureus</i> USA300 | 3.0  | 1.2  | 0.8  | 1.2  | 1.1  | 1.4  | 1.2  | 1.0  |      | 98.5 | 98.7 | 98.5 | 97.8 |
| 10. <i>Staphylococcus epidermidis</i> ATCC12228             | 41.9 | 41.7 | 40.5 | 41.4 | 41.5 | 40.5 | 40.9 | 41.4 | 40.6 |      | 99.8 | 98.5 | 97.8 |
| 11. <i>Staphylococcus epidermidis</i> RP62A                 | 43.9 | 43.7 | 42.5 | 43.4 | 43.5 | 42.5 | 42.9 | 43.4 | 42.6 | 3.0  |      | 98.6 | 97.7 |
| 12. <i>Staphylococcus haemolyticus</i> JCSC1435             | 30.7 | 30.5 | 29.4 | 30.2 | 30.3 | 29.3 | 29.6 | 30.2 | 29.6 | 13.8 | 14.8 |      | 98.7 |
| 13. <i>Staphylococcus saprophyticus</i> ATCC15305           | 12.3 | 13.0 | 12.3 | 12.6 | 12.7 | 12.4 | 12.3 | 12.8 | 97.9 | 32.0 | 33.9 | 26.5 |      |

|                                                | 1    | 2    | 3    | 4    | 5    | 6    | 7    | 8    | 9    | 10   | 11   | 12   | 13   | 14   | 15   |
|------------------------------------------------|------|------|------|------|------|------|------|------|------|------|------|------|------|------|------|
| 1. <i>Streptococcusagalactiae</i> 2603V/R      |      | 99.9 | 99.9 | 93.2 | 95   | 95.2 | 97.1 | 97   | 97.1 | 97.1 | 97.1 | 97   | 97.1 | 93.7 | 93.7 |
| 2. <i>Streptococcusagalactiae</i> A909         | 1.3  |      | 99.9 | 93.1 | 95.1 | 95.1 | 97.2 | 97.1 | 97.2 | 97.2 | 97.2 | 97.1 | 97.2 | 93.8 | 93.8 |
| 3. <i>Streptococcusagalactiae</i> NEM316       | 3.4  | 3.9  |      | 93.1 | 94.9 | 95.1 | 97   | 96.9 | 97   | 97   | 97   | 96.9 | 97   | 93.6 | 93.6 |
| 5. <i>Streptococcusmutans</i> UA159            | 37.1 | 37.2 | 36.7 |      | 93.7 | 93.8 | 93.3 | 93.2 | 93.3 | 93.3 | 93.3 | 93.3 | 93.3 | 94.4 | 94.4 |
| 4. <i>Streptococcus pneumoniae</i> R6          | 39.2 | 40.0 | 36.5 | 44.9 |      | 99.8 | 94.8 | 94.7 | 94.8 | 94.8 | 94.8 | 94.7 | 94.8 | 95.1 | 95.1 |
| 6. <i>Streptococcus pneumoniae</i> TIGR4       | 39.1 | 40.5 | 36.7 | 45.5 | 2.3  |      | 94.6 | 94.5 | 94.6 | 94.6 | 94.6 | 94.5 | 94.6 | 94.9 | 94.9 |
| 7. <i>Streptococcus pyogenes</i> M1GAS         | 23.2 | 23.7 | 22.7 | 24.1 | 37.0 | 36.9 |      | 99.9 | 100  | 100  | 100  | 99.9 | 100  | 95.1 | 95.1 |
| 9. <i>Streptococcus pyogenes</i> MGAS10394     | 22.5 | 23.1 | 21.4 | 25.0 | 36.2 | 36.0 | 1.3  |      | 99.9 | 99.9 | 99.9 | 99.9 | 99.9 | 95.2 | 95.2 |
| 12. <i>Streptococcus pyogenes</i> MGAS315      | 23.3 | 23.8 | 22.8 | 25.4 | 38.9 | 37.8 | 2.7  | 2.9  |      | 100  | 100  | 99.9 | 100  | 95.1 | 95.1 |
| 13. <i>Streptococcus pyogenes</i> MGAS5005     | 22.8 | 23.4 | 22.5 | 23.5 | 36.7 | 36.6 | 0.7  | 1.5  | 2.7  |      | 100  | 99.9 | 100  | 95.1 | 95.1 |
| 14. <i>Streptococcus pyogenes</i> MGAS6180     | 22.3 | 22.4 | 21.0 | 25.4 | 35.6 | 36.3 | 2.3  | 1.4  | 3.8  | 2.5  |      | 99.9 | 100  | 95.1 | 95.1 |
| 15. <i>Streptococcus pyogenes</i> MGAS8232     | 23.2 | 23.7 | 22.6 | 24.7 | 37.8 | 36.8 | 2.0  | 2.2  | 1.1  | 1.8  | 3.2  |      | 99.9 | 95.1 | 95.1 |
| 17. <i>Streptococcus pyogenes</i> SSI-1        | 23.7 | 24.3 | 23.3 | 25.0 | 39.0 | 37.9 | 2.5  | 3.0  | 0.4  | 2.5  | 4.0  | 1.2  |      | 95.1 | 95.1 |
| 18. <i>Streptococcus thermophilus</i> CNRZ1066 | 25.4 | 26.6 | 24.2 | 46.3 | 22.0 | 21.8 | 31.0 | 29.9 | 31.0 | 30.8 | 30.4 | 30.7 | 31.4 |      | 100  |
| 19. <i>Streptococcus thermophilus</i> LMG18311 | 25.7 | 26.8 | 24.5 | 47.0 | 22.5 | 21.9 | 31.7 | 30.5 | 31.3 | 31.5 | 31.0 | 31.0 | 31.6 | 0.9  |      |

|                                                          | 1    | 2    | 3    | 4    | 5    | 6    | 7    | 8    | 9    | 10   | 11   | 12   | 13   | 14   | 15   | 16   |
|----------------------------------------------------------|------|------|------|------|------|------|------|------|------|------|------|------|------|------|------|------|
| 1. <i>Escherichia coli</i> CFT073                        |      | 99.4 | 99.4 | 99.4 | 98.8 | 99.4 | 96.6 | 97   | 97.5 | 97.5 | 97.5 | 98.6 | 98.9 | 98.8 | 98.6 | 99.5 |
| 2. <i>Escherichia coli</i> K12                           | 7.7  |      | 99.9 | 99.9 | 99   | 100  | 96.8 | 97.2 | 97.7 | 97.7 | 97.6 | 98.6 | 99.1 | 98.9 | 98.8 | 99.6 |
| 3. <i>Escherichia coli</i> O157:H7 EDL933                | 3.3  | 6.6  |      | 100  | 99   | 99.9 | 96.8 | 97.2 | 97.7 | 97.7 | 97.6 | 98.6 | 99.1 | 98.9 | 98.8 | 99.6 |
| 4. <i>Escherichia coli</i> O157:H7 str. Sakai            | 3.2  | 7.1  | 0.6  |      | 99   | 99.9 | 96.8 | 97.2 | 97.7 | 97.7 | 97.6 | 98.6 | 99.1 | 98.9 | 98.8 | 99.6 |
| 5. <i>Escherichia coli</i> UTI89                         | 2.8  | 4.9  | 4.0  | 4.2  |      | 99   | 97.4 | 97.8 | 97.1 | 97.1 | 97.1 | 99.2 | 99   | 99.5 | 99.4 | 99   |
| 6. <i>Escherichia coli</i> W3110 DNA                     | 7.6  | 0.3  | 6.4  | 6.9  | 4.7  |      | 96.8 | 97.2 | 97.7 | 97.7 | 97.6 | 98.6 | 99.1 | 98.9 | 98.8 | 99.6 |
| 7. <i>Salmonella enterica</i> subsp. <i>enterica</i> ... | 42.5 | 35.2 | 41.5 | 41.9 | 40.1 | 35.4 |      | 99.6 | 99   | 99   | 99   | 97.4 | 96.7 | 97.3 | 97.6 | 96.8 |
| 8. <i>Salmonella enterica</i> subsp. <i>enterica</i> (2) | 44.1 | 36.7 | 43.1 | 43.5 | 41.6 | 36.9 | 1.6  |      | 99.3 | 99.3 | 99.2 | 97.8 | 97.1 | 97.6 | 98   | 97.2 |
| 9. <i>Salmonella enterica</i> subsp. <i>enterica</i> (3) | 40.4 | 33.5 | 39.4 | 39.7 | 37.9 | 33.7 | 2.2  | 3.7  |      | 100  | 99.7 | 97.1 | 97.2 | 97   | 97.3 | 97.7 |
