# Supplementary material for: The reach of the genome signature in prokaryotes
Source: PubMed Central journal article supplement (PMC1621082; doi:10.1186/1471-2148-6-84), 2006-10-13
Supplement: 1471-2148-6-84-S4.pdf [file 1471-2148-6-84-S4.pdf]

## Additional File 4

Prokaryotic intragenomic genome signature comparisons for species that carry more than 1 chromosome. The numbers correspond to the comparisons depicted in Figure 4.

|                            | <b>Number</b> |                                                       | <b>Accession numbers</b> | <b>Size (bp)</b> |
|----------------------------|---------------|-------------------------------------------------------|--------------------------|------------------|
| <b>Alphaproteobacteria</b> |               |                                                       |                          |                  |
|                            | 1             | Agrobacterium_tumefaciens_str_C58_chromosome_circular | NC_003062                | 2841581          |
|                            |               | Agrobacterium_tumefaciens_str_C58_chromosome_linear   | NC_003305                | 2075560          |
| <b>Alphaproteobacteria</b> |               |                                                       |                          |                  |
|                            | 2             | Brucella_abortus_biovar_1_str_9-941_chromosome_I      | NC_006932                | 2124241          |
|                            |               | Brucella_abortus_biovar_1_str_9-941_chromosome_II     | NC_006933                | 1162204          |
|                            | 3             | Brucella_melitensis_16M_chromosome_I                  | NC_003317                | 2117144          |
|                            |               | Brucella_melitensis_16M_chromosome_II                 | NC_003318                | 1177787          |
|                            | 4             | Brucella_melitensis_biovar_Abortus_2308_chromosome_I  | NC_007618                | 2121359          |
|                            |               | Brucella_melitensis_biovar_Abortus_2308_chromosome_II | NC_007624                | 1156948          |
|                            | 5             | Brucella_suis_1330_chromosome_I                       | NC_004310                | 2107794          |
|                            |               | Brucella_suis_1330_chromosome_II                      | NC_004311                | 1207381          |
| <b>Betaproteobacteria</b>  |               |                                                       |                          |                  |
|                            | 6             | Burkholderia_mallei_ATCC_23344_chromosome_1           | NC_006348                | 3510148          |
|                            |               | Burkholderia_mallei_ATCC_23344_chromosome_2           | NC_006349                | 2325379          |
|                            | 7             | Burkholderia_pseudomallei_1710b_chromosome_I          | NC_007434                | 4126292          |
|                            |               | Burkholderia_pseudomallei_1710b_chromosome_II         | NC_007435                | 3181762          |
|                            | 8             | Burkholderia_pseudomallei_K96243_chromosome_1         | NC_006350                | 4074542          |
|                            |               | Burkholderia_pseudomallei_K96243_chromosome_2         | NC_006351                | 3173005          |
|                            | 9             | Burkholderia_sp_383_chromosome_1                      | NC_007510                | 3694126          |
|                            |               | Burkholderia_sp_383_chromosome_2                      | NC_007511                | 3587082          |
|                            | 10*           | Burkholderia_sp_383_chromosome_3                      | NC_007509                | 1395069          |
|                            | 11            | Burkholderia_thailandensis_E264_chromosome_I          | NC_007651                | 3809201          |
|                            |               | Burkholderia_thailandensis_E264_chromosome_II         | NC_007650                | 2914771          |

|     |                                            |           |         |
|-----|--------------------------------------------|-----------|---------|
| 12  | Burkholderia_xenovorans_LB400_chromosome_1 | NC_007951 | 4895836 |
|     | Burkholderia_xenovorans_LB400_chromosome_2 | NC_007952 | 3363523 |
| 13* | Burkholderia_xenovorans_LB400_chromosome_3 | NC_007953 | 1471779 |
| 14  | Ralstonia_eutropha_JMP134_chromosome_1     | NC_007347 | 3806533 |
|     | Ralstonia_eutropha_JMP134_chromosome_2     | NC_007348 | 2726152 |

#### Deinococcus- Thermus

|    |                                         |           |         |
|----|-----------------------------------------|-----------|---------|
| 15 | Deinococcus_radiodurans_R1_chromosome_1 | NC_001263 | 2648638 |
|    | Deinococcus_radiodurans_R1_chromosome_2 | NC_001264 | 412348  |

#### Gammaproteobacteria

|    |                                                                             |           |         |
|----|-----------------------------------------------------------------------------|-----------|---------|
| 16 | Vibrio_cholerae_O1_biovar_eltor_str_N16961_chromosome_I                     | NC_002505 | 2961149 |
|    | Vibrio_cholerae_O1_biovar_eltor_str_N16961_chromosome_II                    | NC_002506 | 1072315 |
| 17 | Vibrio_fischeri_ES114_chromosome_I                                          | NC_006840 | 2906179 |
|    | Vibrio_fischeri_ES114_chromosome_II                                         | NC_006841 | 1332022 |
| 18 | Vibrio_parahaemolyticus_RIMD_2210633_chromosome_I                           | NC_004603 | 3288558 |
|    | Vibrio_parahaemolyticus_RIMD_2210633_chromosome_II                          | NC_004605 | 1877212 |
| 19 | Vibrio_vulnificus_CMCP6_chromosome_I,_complete                              | NC_004459 | 3281945 |
|    | Vibrio_vulnificus_CMCP6_chromosome_II                                       | NC_004460 | 1844853 |
| 20 | Vibrio_vulnificus_YJ016_chromosome_I,_complete                              | NC_005139 | 3354505 |
|    | Vibrio_vulnificus_YJ016_chromosome_II,_complete                             | NC_005140 | 1857073 |
| 21 | Leptospira_interrogans_serovar_Copenhageni_str_Fiocruz_L1-130_chromosome_I  | NC_005823 | 4277185 |
|    | Leptospira_interrogans_serovar_Copenhageni_str_Fiocruz_L1-130_chromosome_II | NC_005824 | 350181  |
| 22 | Leptospira_interrogans_serovar_Lai_str_56601_chromosome_I                   | NC_004342 | 4332241 |
|    | Leptospira_interrogans_serovar_Lai_str_56601_chromosome_II                  | NC_004343 | 358943  |

**Total number of chromosome sequences**

**42**

\*) For species with three chromosomes, we only analysed the  $\delta^*$  values between chromosome 1 and chromosome 2, and between chromosome 1 and chromosome 3.
